# Supplementary material
Source: MDPI journal article supplement (https://www.mdpi.com/2072-4292/15/5/1368)
Supplement: s1 [file s1]

# A Study on Dynamic Changes of Desertification in Northern China Based on Long-time series MODIS Data and Google Earth Engine

Zhaolin Jiang <sup>1,†</sup>, Xiliang Ni <sup>1,\* ,†</sup>, Minfeng Xing <sup>2,3</sup>

1 Ministry of Education Key Laboratory of Ecology and Resource Use of the Mongolian Plateau, Inner Mongolia Key Laboratory of Grassland Ecology, School of Ecology and Environment, Inner Mongolia University, Hohhot 010021, China

2 School of Resources and Environment, University of Electronic Science and Technology of China, Chengdu 611731, China

3 Yangtze Delta Region Institute (Huzhou), University of Electronic Science and Technology of China, Huzhou 313001, China

\* Correspondence: xiliang.ni@foxmail.com

† These authors contributed equally to this work.

## S1. Tables S1-S2

**Table S1.** Change in land area with different degrees of desertification

| Years | Light(km <sup>2</sup> ) | Moderate(km <sup>2</sup> ) | Severe(km <sup>2</sup> ) | Extremely severe(km <sup>2</sup> ) | Total(km <sup>2</sup> ) |
|-------|-------------------------|----------------------------|--------------------------|------------------------------------|-------------------------|
| 2000  | 831511.55               | 348726.66                  | 762752.21                | 1605472.83                         | 3548463.25              |
| 2001  | 841050.67               | 328836.54                  | 755477.24                | 1623535.03                         | 3548899.48              |
| 2002  | 978302.20               | 302382.72                  | 723673.38                | 1500908.13                         | 3505266.43              |
| 2003  | 992196.69               | 336316.12                  | 699323.95                | 1480921.93                         | 3508758.69              |
| 2004  | 929871.21               | 332738.04                  | 724854.61                | 1525641.50                         | 3513105.36              |
| 2005  | 878365.09               | 288929.58                  | 749494.47                | 1554535.81                         | 3471324.95              |
| 2006  | 936172.05               | 307819.02                  | 776936.48                | 1491387.83                         | 3512315.38              |
| 2007  | 887193.96               | 368273.24                  | 777248.93                | 1461764.69                         | 3494480.82              |
| 2008  | 910048.46               | 310117.01                  | 688291.90                | 1550761.67                         | 3459219.04              |
| 2009  | 873696.90               | 351487.83                  | 748212.16                | 1520251.95                         | 3493648.84              |
| 2010  | 951984.16               | 353279.31                  | 749274.13                | 1434323.43                         | 3488861.03              |
| 2011  | 948315.62               | 349840.58                  | 734508.10                | 1400871.39                         | 3433535.69              |
| 2012  | 963933.17               | 312201.02                  | 701756.65                | 1406486.42                         | 3384377.26              |
| 2013  | 960750.28               | 298160.12                  | 725877.15                | 1395488.64                         | 3380276.19              |
| 2014  | 939663.29               | 301600.37                  | 753453.06                | 1429181.51                         | 3423898.23              |
| 2015  | 912621.12               | 307422.62                  | 762405.83                | 1388048.59                         | 3370498.16              |
| 2016  | 986947.40               | 318729.11                  | 700313.09                | 1379235.59                         | 3385225.19              |
| 2017  | 1000853.43              | 317145.39                  | 668276.81                | 1378985.96                         | 3365261.59              |
| 2018  | 959860.66               | 314822.48                  | 667641.18                | 1354451.65                         | 3296775.97              |
| 2019  | 983870.43               | 271698.09                  | 701456.57                | 1329410.17                         | 3286435.26              |
| 2020  | 908423.78               | 294451.44                  | 727563.18                | 1380181.40                         | 3310619.80              |

**Table S2.** Land use transfer matrix for the study area

| 2020<br>2001  | Desert     | Farmland  | Grassland  | Shrubs   | Snow     | Urban<br>Land | Water    | Wetlands | Woodland | Total      |
|---------------|------------|-----------|------------|----------|----------|---------------|----------|----------|----------|------------|
| Desert        | 2168205.68 | 3100.24   | 98552.87   | 2532.84  | 11047.27 | 30.27         | 2463.04  | 192.45   | 0.00     | 2286124.66 |
| Farmland      | 67.05      | 188129.82 | 12583.49   | 5.15     | 0.00     | 2222.56       | 40.10    | 219.19   | 21.76    | 203289.12  |
| Grassland     | 21111.92   | 61289.21  | 1165965.16 | 4288.12  | 151.69   | 436.74        | 250.28   | 1073.93  | 976.08   | 1255543.12 |
| Shrubs        | 1050.29    | 10.98     | 3064.58    | 5756.65  | 45.60    | 0             | 0        | 0.65     | 477.66   | 10406.40   |
| Snow          | 1438.06    | 0.63      | 44.31      | 1.46     | 13451.31 | 0             | 7.25     | 0.50     | 0        | 14943.51   |
| Urban<br>Land | 0          | 0         | 0          | 0        | 0        | 22344.21      | 0        | 0        | 0        | 22344.21   |
| Water         | 976.23     | 26.77     | 410.46     | 0.00     | 98.24    | 0.57          | 20494.87 | 90.62    | 0        | 22097.76   |
| Wetlands      | 42.38      | 19.07     | 276.94     | 0.00     | 1.60     | 18.94         | 124.91   | 898.65   | 19.35    | 1401.84    |
| Woodland      | 0.50       | 0.18      | 260.49     | 45.31    | 4.16     | 0.00          | 0.00     | 21.51    | 1509.59  | 1841.73    |
| Total         | 2192892.11 | 252576.90 | 1281158.29 | 12629.54 | 24799.86 | 25053.30      | 23380.45 | 2497.49  | 3004.42  | 3817992.36 |

S2. Figure S1

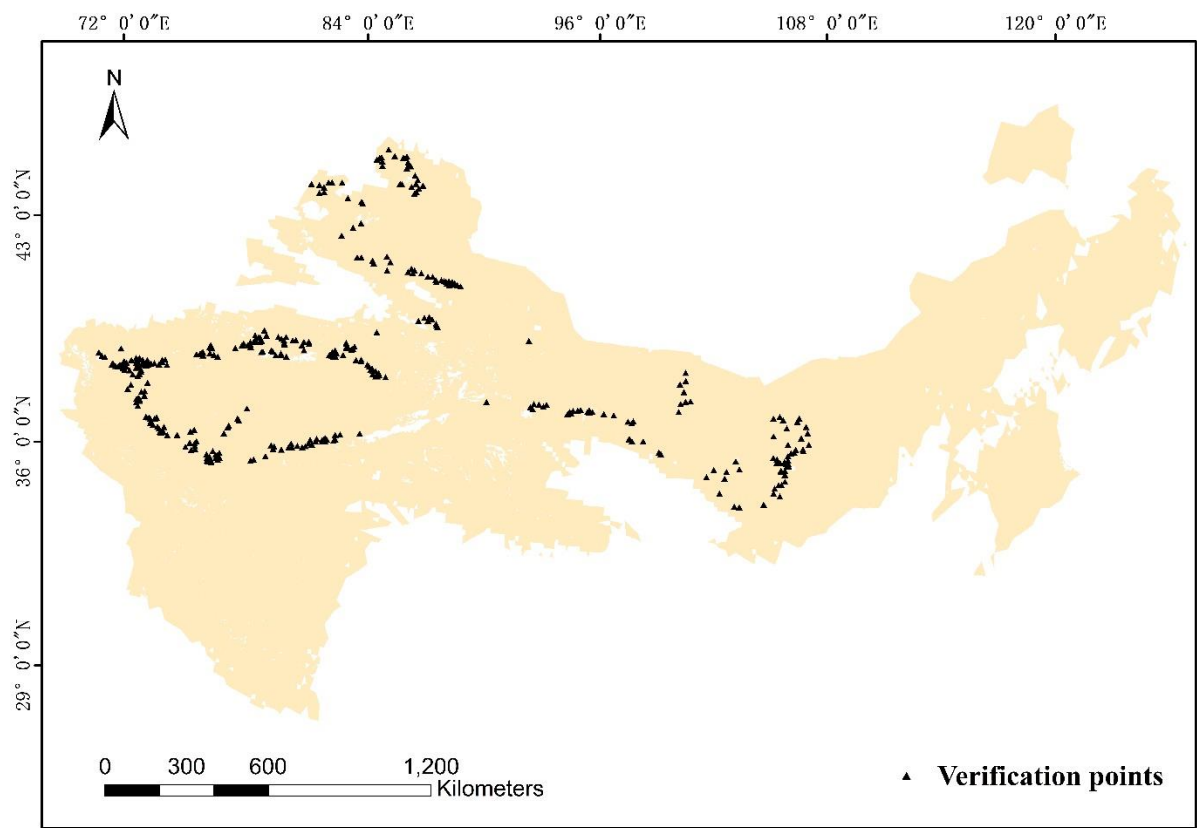

**Figure S1.** Precision verification point distribution of the data set. The dataset classifies desertification categories into extremely severe, severe, moderate, and light, mainly by drifting sand area and vegetation cover.
